# Supplementary material for: Assessing Student’s Achievement Gaps between Ethnic Groups in Brazil
Source: MDPI journal article supplement (doi:10.3390/jintelligence7010007), 2019-02-20
Supplement: s1 [file s1]

**Supplementary Information:**  
**Assessing student's achievement gap between ethnic groups in Brazil**

Luis E C Rocha\*

*Centre for Business Network Analysis, University of Greenwich, London, UK*

Luana F Nascimento†

*Radiation Protection Dosimetry and Calibration group,  
Belgian Nuclear Research Center, Mol, Belgium*

(Dated: February 20, 2019)

---

\* luis.rocha@gre.ac.uk

† ldfnasci@sckcen.be

TABLE S1. **Keywords for the inclusion criteria, values and brief description. Keywords as they appear in the original data set.**

| CODE                     | VALUE         | BRIEF DESCRIPTION                                                    |
|--------------------------|---------------|----------------------------------------------------------------------|
| ID_DEPENDENCIA_ADM_ESC   | 1 AND 2 AND 3 | school is public management                                          |
| ID_LOCALIZACAO_ESC       | 1             | school is urban                                                      |
| SIT_FUNC_ESC             | 1             | school is active                                                     |
| IDADE                    | 17            | student age                                                          |
| NACIONALIDADE            | 1             | student is born in Brazil                                            |
| ST_CONCLUSAO             | 2             | student will graduate in 2013                                        |
| TP_ESCOLA                | 1             | school is public                                                     |
| IN_TP_ENSINO             | 1             | school is not for special students                                   |
| TP_ESTADO_CIVIL          | 0             | student is single                                                    |
| IN_BAIXA_VISAO           | 0             | student has no low vision                                            |
| IN_CEGUEIRA              | 0             | student is not blind                                                 |
| IN_SURDEZ                | 0             | student is not deaf                                                  |
| IN_DEFICIENCIA_AUDITIVA  | 0             | student has no auditory disability                                   |
| IN_SURDO_CEGUEIRA        | 0             | student is not deaf and not blind                                    |
| IN_DEFICIENCIA_FISICA    | 0             | student has no physical disability                                   |
| IN_DEFICIENCIA_MENTAL    | 0             | student has no mental disability                                     |
| IN_DEFICIT_ATENCAO       | 0             | student has no attention deficit                                     |
| IN_DISLEXIA              | 0             | student has not dyslexia                                             |
| IN_GESTANTE              | 0             | student is not pregnant                                              |
| IN_LACTANTE              | 0             | student is not lactating                                             |
| IN_IDOSO                 | 0             | elderly student, 60 or above                                         |
| IN_AUTISMO               | 0             | student is not autistic                                              |
| IN_BRILLE                | 0             | student does not need exam in Braille                                |
| IN_AMPLIADA_24           | 0             | student does not need exam with larger fonts                         |
| IN_AMPLIADA_18           | 0             | student does not need exam with larger fonts                         |
| IN_LEDOR                 | 0             | student does not need an auxiliary person to read and write the exam |
| IN_ACESSO                | 0             | student does not need a class with special access                    |
| IN_TRANSCRICAO           | 0             | student does not need an auxiliary person to transcribe the text     |
| IN_LIBRAS                | 0             | student does not need an auxiliary person for sign language          |
| IN_LEITURA_LABIAL        | 0             | student does not need an auxiliary person for lip reading            |
| IN_MESA_CADEIRA_RODAS    | 0             | student does not need a desk for wheelchair                          |
| IN_MESA_CADEIRA_SEPARADA | 0             | student does not need separated desk and chair                       |
| IN_APOIO_PERNA           | 0             | student does not need an auxiliary device to rest his/her legs       |
| IN_GUIA_INTERPRETE       | 0             | student does not need an auxiliary person for translation            |
| IN_PRESENCA_CN           | 1             | student participated in the natural sciences examination             |
| IN_PRESENCA_CH           | 1             | student participated in the human sciences examination               |
| IN_PRESENCA_LC           | 1             | student participated in the languages examination                    |
| IN_PRESENCA_MT           | 1             | student participated in the mathematics examination                  |
| Q004                     | 1 AND 2 AND 3 | student lives in a household with 6 or less people                   |
|                          | 4 AND 5 AND 6 |                                                                      |
| Q006                     | B             | student lives in an urban area                                       |

TABLE S2. The gap ( $\Delta$ ) in the performance scores between ethnic groups and respective statistical significance ( $p$ -values) for household income levels in mathematics. Very low income corresponds to G1 in the main text, and very high income corresponds to G6. Cases of  $p < .01$  are highlighted. Ethnic groups correspond to W: White; B: Black; P: Pardo; A: Asian; I: Indigenous; All: All ethnic groups compared simultaneously.

| Brazilian State |         | Very low income |       |       |       |      | Very high income |       |       |       |     |
|-----------------|---------|-----------------|-------|-------|-------|------|------------------|-------|-------|-------|-----|
|                 |         | All             | W-B   | W-P   | W-A   | W-I  | All              | W-B   | W-P   | W-A   | W-I |
| AC              | Δ(%)    |                 | 0.9   | -2.0  | -3.3  | -    |                  | -     | -     | -     | -   |
|                 | p-value | .40             | .73   | .29   | .46   | -    | -                | -     | -     | -     | -   |
| AL              | Δ(%)    |                 | -0.2  | 1.3   | -1.9  | 4.5  |                  | -     | -     | -     | -   |
|                 | p-value | .47             | .91   | .29   | .43   | .43  | -                | -     | -     | -     | -   |
| AP              | Δ(%)    |                 | 0.1   | -0.3  | -7.0  | -    |                  | -     | -     | -     | -   |
|                 | p-value | .43             | .96   | .86   | .13   | -    | -                | -     | -     | -     | -   |
| AM              | Δ(%)    |                 | -1.0  | 0.3   | -2.2  | -2.0 |                  | -     | 0.6   | -     | -   |
|                 | p-value | .67             | .57   | .79   | .38   | .50  | -                | -     | .89   | -     | -   |
| BA              | Δ(%)    |                 | 1.4   | 1.7   | 1.2   | 2.6  |                  | -     | 2.6   | -     | -   |
|                 | p-value | .09             | .04   | < .01 | .35   | .17  | -                | -     | .71   | -     | -   |
| CE              | Δ(%)    |                 | 0.6   | 2.7   | -0.9  | 1.2  |                  | -     | 12.0  | -     | -   |
|                 | p-value | < .01           | .40   | < .01 | .53   | .64  | -                | -     | .25   | -     | -   |
| DF              | Δ(%)    |                 | 3.7   | 3.3   | -0.1  | 11.0 |                  | 10.3  | 5.4   | -     | -   |
|                 | p-value | .11             | .07   | .03   | .98   | -    | < .01            | .01   | .01   | -     | -   |
| ES              | Δ(%)    |                 | 4.1   | 1.2   | 0.1   | -4.2 |                  | -     | 2.0   | -     | -   |
|                 | p-value | .08             | < .01 | .23   | .97   | .34  | -                | -     | .65   | -     | -   |
| GO              | Δ(%)    |                 | 1.0   | 1.5   | 0.9   | 2.3  |                  | -2.3  | -0.2  | -     | -   |
|                 | p-value | .35             | .33   | .04   | .60   | .48  | .94              | .73   | .94   | -     | -   |
| MA              | Δ(%)    |                 | 0.4   | 1.3   | -1.3  | 6.9  |                  | -     | -     | -     | -   |
|                 | p-value | .05             | .59   | .05   | .48   | .04  | -                | -     | -     | -     | -   |
| MT              | Δ(%)    |                 | 1.1   | 1.8   | 4.8   | -    |                  | -     | 0.2   | -     | -   |
|                 | p-value | .31             | .45   | .09   | .25   | -    | -                | -     | .82   | -     | -   |
| MS              | Δ(%)    |                 | -0.6  | 1.9   | -1.4  | -    |                  | -     | -1.1  | -     | -   |
|                 | p-value | .21             | .77   | .06   | .72   | -    | -                | -     | .84   | -     | -   |
| MG              | Δ(%)    |                 | 2.9   | 2.6   | 3.4   | 3.3  |                  | 5.2   | 2.0   | 13.7  | -   |
|                 | p-value | < .01           | < .01 | < .01 | < .01 | .06  | .05              | .05   | .21   | .05   | -   |
| PR              | Δ(%)    |                 | 4.1   | 1.1   | 1.3   | -    |                  | 1.0   | 0     | -11.0 | -   |
|                 | p-value | .01             | < .01 | .09   | .60   | -    | .46              | .89   | .99   | .13   | -   |
| PB              | Δ(%)    |                 | 2.9   | 1.6   | 1.9   | 3.6  |                  | -     | -     | -     | -   |
|                 | p-value | .10             | .01   | .03   | .30   | .29  | -                | -     | -     | -     | -   |
| PA              | Δ(%)    |                 | -1.7  | 0.1   | 2.0   | 2.4  |                  | -     | 2.9   | -     | -   |
|                 | p-value | .28             | .13   | .93   | .37   | .58  | -                | -     | .58   | -     | -   |
| PE              | Δ(%)    |                 | 1.2   | 1.2   | 1.8   | 3.7  |                  | -     | 4.6   | -     | -   |
|                 | p-value | .07             | .09   | .01   | .16   | .09  | -                | -     | .36   | -     | -   |
| PI              | Δ(%)    |                 | 1.1   | 1.6   | -0.6  | 2.8  |                  | -     | -     | -     | -   |
|                 | p-value | .48             | .42   | .10   | .79   | .63  | -                | -     | -     | -     | -   |
| RJ              | Δ(%)    |                 | 4.5   | 3.2   | 1.4   | 5.2  |                  | 11.2  | 7.0   | -     | -   |
|                 | p-value | < .01           | < .01 | < .01 | .51   | .24  | < .01            | .01   | < .01 | -     | -   |
| RN              | Δ(%)    |                 | 0     | 0.9   | 2.5   | 0    |                  | -     | -     | -     | -   |
|                 | p-value | .71             | .99   | .28   | .28   | .99  | -                | -     | -     | -     | -   |
| RO              | Δ(%)    |                 | -4.5  | -2.0  | -1.6  | -    |                  | -     | 5.3   | -     | -   |
|                 | p-value | .23             | .04   | .19   | .60   | -    | -                | -     | .31   | -     | -   |
| RR              | Δ(%)    |                 | 0.4   | 0.5   | -     | -    |                  | -     | -     | -     | -   |
|                 | p-value | .98             | .93   | .84   | -     | -    | -                | -     | -     | -     | -   |
| RS              | Δ(%)    |                 | 3.6   | 2.1   | 0.6   | -    |                  | 6.2   | 2.4   | -     | -   |
|                 | p-value | < .01           | < .01 | .01   | .85   | -    | .44              | .26   | .51   | -     | -   |
| SC              | Δ(%)    |                 | 1.4   | 2.7   | -3.4  | -    |                  | -     | 3.4   | -     | -   |
|                 | p-value | .10             | .47   | .02   | .39   | -    | -                | -     | .38   | -     | -   |
| SE              | Δ(%)    |                 | -1.0  | -0.8  | 0.4   | 3.0  |                  | -     | -1-   | -     | -   |
|                 | p-value | .83             | .58   | .58   | .89   | .45  | -                | -     | -     | -     | -   |
| SP              | Δ(%)    |                 | 2.0   | 2.1   | 1.0   | 1.8  |                  | 6.5   | 3.9   | -14.5 | -   |
|                 | p-value | < .01           | < .01 | < .01 | .43   | .34  | < .01            | < .01 | < .01 | < .01 | -   |
| TO              | Δ(%)    |                 | 2.6   | 0.3   | -3.4  | -    |                  | -7.2  | -7.4  | -     | -   |
|                 | p-value | .10             | .10   | .81   | .21   | -    | .44              | .33   | .21   | -     | -   |

TABLE S3. The gap ( $\Delta$ ) in the performance scores between ethnic groups and respective statistical significance ( $p$ -values) for household income levels in writing. Very low income corresponds to G1 in the main text, and very high income corresponds to G6. Cases of  $p < .01$  are highlighted. Ethnic groups correspond to W: White; B: Black; P: Pardo; A: Asian; I: Indigenous; All: All ethnic groups compared simultaneously.

| Brazilian State |              | Very low income |       |       |       |       | Very high income |       |      |       |     |
|-----------------|--------------|-----------------|-------|-------|-------|-------|------------------|-------|------|-------|-----|
|                 |              | All             | W-B   | W-P   | W-A   | W-I   | All              | W-B   | W-P  | W-A   | W-I |
| AC              | $\Delta(\%)$ |                 | -4.4  | -0.2  | -11.1 | -     |                  | -     | -    | -     | -   |
|                 | p-value      | .10             | .39   | .96   | .04   | -     | -                | -     | -    | -     | -   |
| AL              | $\Delta(\%)$ |                 | 2.6   | 1.9   | -0.6  | 2.5   |                  | -     | -    | -     | -   |
|                 | p-value      | .93             | .52   | .49   | .91   | .84   | -                | -     | -    | -     | -   |
| AP              | $\Delta(\%)$ |                 | 13.5  | 8.8   | -8.6  | -     |                  | -     | -    | -     | -   |
|                 | p-value      | < .01           | < .01 | .02   | .28   | -     | -                | -     | -    | -     | -   |
| AM              | $\Delta(\%)$ |                 | 5.0   | 6.2   | -7.3  | 4.0   |                  | -     | 1.0  | -     | -   |
|                 | p-value      | < .01           | .22   | < .01 | .15   | .54   | -                | -     | .83  | -     | -   |
| BA              | $\Delta(\%)$ |                 | 3.6   | 3.0   | -0.6  | 16.8  |                  | -     | -2.6 | -     | -   |
|                 | p-value      | < .01           | .01   | .02   | .83   | < .01 | -                | -     | .70  | -     | -   |
| CE              | $\Delta(\%)$ |                 | 1.6   | 5.6   | 0.6   | 4.7   |                  | -     | 7.3  | -     | -   |
|                 | p-value      | < .01           | .27   | < .01 | .81   | .36   | -                | -     | .56  | -     | -   |
| DF              | $\Delta(\%)$ |                 | 0.1   | 4.1   | 1.9   | -     |                  | 10.0  | 5.6  | -     | -   |
|                 | p-value      | .35             | .98   | .11   | .73   | -     | .01              | .01   | .02  | -     | -   |
| ES              | $\Delta(\%)$ |                 | 7.5   | 3.9   | 8.9   | 4.3   |                  | -     | 4.2  | -     | -   |
|                 | p-value      | .09             | .01   | .03   | .24   | .58   | -                | -     | .46  | -     | -   |
| GO              | $\Delta(\%)$ |                 | 1.6   | 3.2   | -2.4  | 1.1   |                  | -1.7  | 4.2  | -     | -   |
|                 | p-value      | .13             | .47   | .04   | .41   | .88   | .59              | .83   | .34  | -     | -   |
| MA              | $\Delta(\%)$ |                 | 1.3   | 4.2   | -2.8  | -5.0  |                  | -     | -    | -     | -   |
|                 | p-value      | .03             | .52   | < .01 | .51   | .60   | -                | -     | -    | -     | -   |
| MT              | $\Delta(\%)$ |                 | 9.0   | 3.7   | 23.1  | -     |                  | -     | -    | -     | -   |
|                 | p-value      | < .01           | < .01 | .09   | < .01 | -     | -                | -     | -    | -     | -   |
| MS              | $\Delta(\%)$ |                 | 1.3   | 3.0   | 23.7  | -     |                  | -     | 0.2  | -     | -   |
|                 | p-value      | .11             | .72   | .12   | .05   | -     | -                | -     | .98  | -     | -   |
| MG              | $\Delta(\%)$ |                 | 4.7   | 4.9   | 4.6   | 6.0   |                  | 2.9   | 2.4  | 11.2  | -   |
|                 | p-value      | < .01           | < .01 | < .01 | .04   | .09   | .20              | .45   | .23  | .07   | -   |
| PR              | $\Delta(\%)$ |                 | 9.3   | 2.9   | -6.1  | -     |                  | 7.8   | 7.3  | -9.8  | -   |
|                 | p-value      | < .01           | < .01 | .03   | .20   | -     | .11              | .39   | .05  | .19   | -   |
| PB              | $\Delta(\%)$ |                 | 2.4   | 1.6   | 4.3   | 7.8   |                  | -     | -    | -     | -   |
|                 | p-value      | .56             | .31   | .30   | .31   | .25   | -                | -     | -    | -     | -   |
| PA              | $\Delta(\%)$ |                 | -0.8  | 2.2   | -1.8  | 4.9   |                  | -     | -0.3 | -     | -   |
|                 | p-value      | .28             | .70   | .17   | .69   | .65   | -                | -     | .98  | -     | -   |
| PE              | $\Delta(\%)$ |                 | 6.3   | 5.2   | 8.0   | 5.5   |                  | -     | 9.2  | -     | -   |
|                 | p-value      | < .01           | < .01 | < .01 | < .01 | .17   | -                | -     | .11  | -     | -   |
| PI              | $\Delta(\%)$ |                 | 4.9   | 2.8   | 1.6   | 8.1   |                  | -     | -    | -     | -   |
|                 | p-value      | .49             | .08   | .18   | .73   | .44   | -                | -     | -    | -     | -   |
| RJ              | $\Delta(\%)$ |                 | 5.5   | 6.1   | -2.5  | -0.7  |                  | 5.2   | 4.0  | -     | -   |
|                 | p-value      | < .01           | < .01 | < .01 | .44   | .92   | .14              | .18   | .09  | -     | -   |
| RN              | $\Delta(\%)$ |                 | 4.1   | 3.0   | 1.5   | -3.8  |                  | -     | -    | -     | -   |
|                 | p-value      | .36             | .12   | .08   | .77   | .63   | -                | -     | -    | -     | -   |
| RO              | $\Delta(\%)$ |                 | -3.3  | 0.3   | 1.2   | -     |                  | -     | -6.7 | -     | -   |
|                 | p-value      | .89             | .51   | .93   | .90   | -     | -                | -     | .54  | -     | -   |
| RR              | $\Delta(\%)$ |                 | 10.0  | 12.5  | -     | -     |                  | -     | -    | -     | -   |
|                 | p-value      | .11             | .22   | .04   | -     | -     | -                | -     | -    | -     | -   |
| RS              | $\Delta(\%)$ |                 | 2.4   | 2.7   | 4.8   | -     |                  | 15.9  | -3.6 | -     | -   |
|                 | p-value      | .23             | .24   | .08   | .44   | -     | .12              | .08   | .31  | -     | -   |
| SC              | $\Delta(\%)$ |                 | -1.2  | 0     | -0.2  | -     |                  | -     | -3.4 | -     | -   |
|                 | p-value      | .99             | .71   | .99   | .94   | -     | .99              | -     | .48  | -     | -   |
| SE              | $\Delta(\%)$ |                 | -3.3  | -5.7  | -9.1  | 9.0   |                  | -     | -    | -     | -   |
|                 | p-value      | .20             | .39   | .06   | .15   | .43   | -                | -     | -    | -     | -   |
| SP              | $\Delta(\%)$ |                 | 3.4   | 3.4   | 2.2   | 1.3   |                  | 9.0   | 2.6  | -7.4  | -   |
|                 | p-value      | < .01           | < .01 | < .01 | .42   | .72   | < .01            | < .01 | .04  | < .01 | -   |
| TO              | $\Delta(\%)$ |                 | 5.4   | 1.3   | 0.9   | -     |                  | 8.4   | 6.7  | -     | -   |
|                 | p-value      | .58             | .21   | .69   | .89   | -     | .40              | .19   | .28  | -     | -   |

TABLE S4. The gap ( $\Delta$ ) in the performance scores between ethnic groups and respective statistical significance ( $p$ -values) for parental education levels in mathematics. Very low education corresponds to G2 in the main text, and very high education corresponds to G5. Cases of  $p < .01$  are highlighted. Ethnic groups correspond to W: White; B: Black; P: Pardo; A: Asian; I: Indigenous; All: All ethnic groups compared simultaneously.

| Brazilian State |              | Very low education |       |        |       |       | Very high education |       |       |       |     |
|-----------------|--------------|--------------------|-------|--------|-------|-------|---------------------|-------|-------|-------|-----|
|                 |              | All                | W-B   | W-P    | W-A   | W-I   | All                 | W-B   | W-P   | W-A   | W-I |
| AC              | $\Delta(\%)$ |                    | 0.6   | 5.4    | -     | -     |                     | 2.6   | -3.0  | -     | -   |
|                 | p-value      | .2                 | .90   | .15    | -     | -     | .11                 | .44   | .17   | -     | -   |
| AL              | $\Delta(\%)$ |                    | 8.2   | 4.0    | 2.5   | -     |                     | -3.4  | 3.7   | -     | -   |
|                 | p-value      | .08                | < .01 | .07    | .61   | -     | .27                 | .56   | .23   | -     | -   |
| AP              | $\Delta(\%)$ |                    | -     | -1.1   | -     | -     |                     | -0.5  | -2.0  | -     | -   |
|                 | p-value      | -                  | -     | .88    | -     | -     | .65                 | .88   | 0.39  | -     | -   |
| AM              | $\Delta(\%)$ |                    | -0.1  | 5.6    | -     | -     |                     | -1.4  | 3.2   | -4.7  | 8.1 |
|                 | p-value      | .09                | .98   | .08    | -     | -     | .04                 | .62   | .02   | .34   | .10 |
| BA              | $\Delta(\%)$ |                    | 3.7   | 2.4    | 3.2   | -1.6  |                     | 0.1   | 0     | 3.9   | 5.0 |
|                 | p-value      | .14                | .01   | .06    | .25   | .73   | .54                 | .54   | .98   | .19   | .35 |
| CE              | $\Delta(\%)$ |                    | -0.5  | 3.0    | -2.5  | 14.0  |                     | -0.1  | 0.9   | -1.2  | 4.9 |
|                 | p-value      | < .01              | .74   | < 0.01 | .32   | < .01 | .75                 | .97   | .49   | .74   | .27 |
| DF              | $\Delta(\%)$ |                    | -1.0  | 3.8    | -     | -     |                     | 6.2   | 4.4   | 2.8   | -   |
|                 | p-value      | .2                 | .80   | .17    | -     | -     | < .01               | < .01 | < .01 | 0.44  | -   |
| ES              | $\Delta(\%)$ |                    | 6.2   | 4.5    | -     | -     |                     | 4.8   | 2.6   | 4.9   | -   |
|                 | p-value      | < .01              | < .01 | < .01  | -     | -     | .06                 | .02   | .04   | .34   | -   |
| GO              | $\Delta(\%)$ |                    | 4.1   | 1.4    | 1.8   | -     |                     | 3.5   | 1.8   | 2.8   | -   |
|                 | p-value      | .18                | .03   | .29    | .43   | -     | .07                 | .02   | .05   | .20   | -   |
| MA              | $\Delta(\%)$ |                    | 2.8   | 0.8    | 2.9   | -     |                     | -1.7  | 0.9   | 2.6   | -   |
|                 | p-value      | .46                | .14   | .57    | .43   | -     | .48                 | .39   | .46   | .57   | -   |
| MT              | $\Delta(\%)$ |                    | 0     | 3.8    | -     | -     |                     | 4.2   | 2.3   | 2.4   | -   |
|                 | p-value      | .08                | .99   | .04    | -     | -     | .04                 | < .01 | .02   | .68   | -   |
| MS              | $\Delta(\%)$ |                    | -3.2  | 4.3    | -     | -     |                     | 2.7   | 2.7   | -3.2  | -   |
|                 | p-value      | .04                | .36   | .04    | -     | -     | .14                 | .36   | .03   | .55   | -   |
| MG              | $\Delta(\%)$ |                    | 6.3   | 3.8    | 4.8   | 4.9   |                     | 4.1   | 3.3   | 5.2   | 9.5 |
|                 | p-value      | < .01              | < .01 | < .01  | < .01 | .13   | < .01               | < .01 | < .01 | < .01 | .02 |
| PR              | $\Delta(\%)$ |                    | 3.9   | 1.7    | -5.6  | -     |                     | 5.7   | 3.9   | -8.4  | -   |
|                 | p-value      | .01                | .01   | .02    | .29   | -     | < .01               | < .01 | < .01 | < .01 | -   |
| PB              | $\Delta(\%)$ |                    | -0.8  | -0.3   | -1.0  | 7.9   |                     | 4.9   | 5.3   | 11.0  | -   |
|                 | p-value      | .14                | .74   | .82    | .78   | .03   | < .01               | 0.10  | < .01 | .01   | -   |
| PA              | $\Delta(\%)$ |                    | 1.7   | 1.6    | -     | -     |                     | -1.4  | 0.6   | 1.2   | -   |
|                 | p-value      | .75                | .54   | .45    | -     | -     | .76                 | .53   | .68   | .79   | -   |
| PE              | $\Delta(\%)$ |                    | 2.7   | 0.6    | 0.3   | -2.4  |                     | 6.0   | 1.9   | 4.9   | 9.2 |
|                 | p-value      | .56                | .10   | .57    | .90   | .70   | < .01               | < .01 | .09   | .16   | .02 |
| PI              | $\Delta(\%)$ |                    | 3.7   | 4.5    | 6.1   | -     |                     | 1.8   | -1.3  | -3.5  | -   |
|                 | p-value      | .11                | .20   | .02    | .12   | -     | .50                 | .49   | .51   | .51   | -   |
| RJ              | $\Delta(\%)$ |                    | 2.0   | -0.9   | 4.2   | -     |                     | 10.0  | 5.9   | 17.2  | -   |
|                 | p-value      | .30                | .29   | .56    | .25   | -     | < .01               | < .01 | < .01 | < .01 | -   |
| RN              | $\Delta(\%)$ |                    | 1.2   | 2.8    | 7.9   | -     |                     | 2.0   | 2.1   | 0.2   | -   |
|                 | p-value      | .18                | .68   | .10    | .07   | -     | .81                 | .64   | .33   | .98   | -   |
| RS              | $\Delta(\%)$ |                    | 7.8   | 3.1    | 7.9   | -     |                     | 8.5   | 3.8   | 5.5   | -   |
|                 | p-value      | < .01              | < .01 | .01    | .09   | -     | < .01               | < .01 | < .01 | .21   | -   |
| RO              | $\Delta(\%)$ |                    | -0.4  | -0.1   | -     | -     |                     | -0.8  | 1.6   | 4.5   | -   |
|                 | p-value      | -                  | .92   | .97    | -     | -     | .48                 | .80   | .25   | .27   | -   |
| RR              | $\Delta(\%)$ |                    | -     | -      | -     | -     |                     | -1.9  | 1.8   | -     | -   |
|                 | p-value      | -                  | -     | -      | -     | -     | .64                 | .68   | .56   | -     | -   |
| SC              | $\Delta(\%)$ |                    | 3.3   | 1.8    | -1.4  | -     |                     | 4.8   | 5.6   | 6.8   | -   |
|                 | p-value      | .24                | .20   | .11    | .62   | -     | < .01               | .07   | < .01 | .06   | -   |
| SE              | $\Delta(\%)$ |                    | -2.8  | -2.2   | 0.6   | -     |                     | 1.7   | 0.9   | -     | -   |
|                 | p-value      | .81                | .45   | .47    | .90   | -     | .93                 | .71   | .82   | -     | -   |
| SP              | $\Delta(\%)$ |                    | 2.9   | 2.6    | 2.8   | 4.8   |                     | 6.2   | 5.5   | -9.1  | 7.3 |
|                 | p-value      | < .01              | < .01 | < .01  | .11   | .03   | < .01               | < .01 | < .01 | < .01 | .01 |
| TO              | $\Delta(\%)$ |                    | 4.7   | 0.4    | -     | -     |                     | 3.0   | 5.0   | 2.2   | -   |
|                 | p-value      | .24                | .18   | .89    | -     | -     | .02                 | .16   | < .01 | .56   | -   |

TABLE S5. The gap ( $\Delta$ ) in the performance scores between ethnic groups and respective statistical significance ( $p$ -values) for parental education levels in writing. Very low education corresponds to G2 in the main text, and very high education corresponds to G5. Cases of  $p < .01$  are highlighted. Ethnic groups correspond to W: White; B: Black; P: Pardo; A: Asian; I: Indigenous; All: All ethnic groups compared simultaneously.

| Brazilian State |              | Very low education |       |        |       |      | Very high education |       |       |       |       |
|-----------------|--------------|--------------------|-------|--------|-------|------|---------------------|-------|-------|-------|-------|
|                 |              | All                | W-B   | W-P    | W-A   | W-I  | All                 | W-B   | W-P   | W-A   | W-I   |
| AC              | $\Delta(\%)$ |                    | -1.7  | 4.4    | -     | -    |                     | 1.1   | -0.1  | -     | -     |
|                 | p-value      | .57                | .82   | .45    | -     | -    | 0.99                | 0.90  | 0.97  | -     | -     |
| AL              | $\Delta(\%)$ |                    | 11.5  | 4.8    | 2.1   | -    |                     | -3.4  | 3.7   | -     | -     |
|                 | p-value      | 0.41               | 0.09  | 0.35   | 0.85  | -    | 0.08                | 0.74  | 0.05  | -     | -     |
| AP              | $\Delta(\%)$ |                    | -     | -11.7  | -     | -    |                     | 3.7   | 0.2   | -     | -     |
|                 | p-value      | -                  | -     | 0.43   | -     | -    | 0.72                | 0.50  | 0.96  | -     | -     |
| AM              | $\Delta(\%)$ |                    | -0.5  | 1.5    | -     | -    |                     | -3.9  | 1.5   | -1.2  | 5.4   |
|                 | p-value      | .96                | .97   | .85    | -     | -    | .86                 | .43   | .41   | .85   | .47   |
| BA              | $\Delta(\%)$ |                    | 3.2   | -0.7   | -9.9  | 15.6 |                     | -3.3  | -2.1  | 1.8   | 20.3  |
|                 | p-value      | .12                | .36   | .82    | .09   | .23  | .27                 | .12   | .25   | .67   | .22   |
| CE              | $\Delta(\%)$ |                    | 1.4   | 6.0    | -4.2  | -5.4 |                     | -3.3  | -1.3  | -7.5  | -1.9  |
|                 | p-value      | < .01              | .69   | < 0.01 | .40   | .46  | .31                 | .25   | .46   | .04   | .74   |
| DF              | $\Delta(\%)$ |                    | -2.1  | 4.2    | -     | -    |                     | 0.7   | 3.3   | -0.9  | -     |
|                 | p-value      | .32                | .66   | .31    | -     | -    | .17                 | .77   | .03   | .84   | -     |
| ES              | $\Delta(\%)$ |                    | 9.0   | 2.6    | -     | -    |                     | 3.5   | 2.5   | 11.7  | -     |
|                 | p-value      | .09                | .03   | .31    | -     | -    | .29                 | .19   | .16   | .22   | -     |
| GO              | $\Delta(\%)$ |                    | 5.0   | 6.0    | 7.6   | -    |                     | 4.0   | 2.7   | -2.2  | -     |
|                 | p-value      | .21                | .20   | .04    | .14   | -    | .11                 | .09   | .06   | .52   | -     |
| MA              | $\Delta(\%)$ |                    | -3.80 | 5.2    | -0.7  | -    |                     | -3.1  | -0.4  | -5.4  | -     |
|                 | p-value      | .13                | .53   | .22    | .95   | -    | .60                 | .33   | .85   | .33   | -     |
| MT              | $\Delta(\%)$ |                    | 5.9   | 3.9    | -     | -    |                     | -1.8  | 2.5   | 5.5   | -     |
|                 | p-value      | .45                | .33   | .27    | -     | -    | .27                 | .51   | .14   | .44   | -     |
| MS              | $\Delta(\%)$ |                    | -3.9  | -0.9   | -     | -    |                     | -2.9  | 4.5   | 1.7   | -     |
|                 | p-value      | .78                | .48   | .80    | -     | -    | .06                 | .42   | .01   | .83   | -     |
| MG              | $\Delta(\%)$ |                    | 8.1   | 5.5    | 2.2   | 13.1 |                     | 4.2   | 3.5   | 5.7   | 15.3  |
|                 | p-value      | < .01              | < .01 | < .01  | .44   | .02  | < .01               | < .01 | < .01 | .06   | < .01 |
| PR              | $\Delta(\%)$ |                    | 7.8   | 2.3    | -18.3 | -    |                     | 1.2   | 2.5   | -9.0  | -     |
|                 | p-value      | < .01              | .03   | .11    | < .01 | -    | < .01               | .58   | .02   | < .01 | -     |
| PB              | $\Delta(\%)$ |                    | 1.5   | 4.3    | 3.4   | 47.3 |                     | 8.7   | 1.2   | -3.0  | -     |
|                 | p-value      | .08                | .72   | .18    | .67   | .02  | .24                 | 0.05  | .66   | .75   | -     |
| PA              | $\Delta(\%)$ |                    | -2.8  | -0.3   | -     | -    |                     | 10.8  | 7.1   | 19.0  | -     |
|                 | p-value      | .84                | .61   | .95    | -     | -    | < .01               | < .01 | < .01 | .02   | -     |
| PE              | $\Delta(\%)$ |                    | 7.1   | 6.2    | 2.7   | 5.9  |                     | 4.9   | 2.6   | 6.3   | 14.6  |
|                 | p-value      | .07                | .06   | < .01  | .55   | .62  | .06                 | .06   | .11   | .19   | .03   |
| PI              | $\Delta(\%)$ |                    | 3.7   | 4.0    | 9.2   | -    |                     | 6.7   | -0.2  | -4.9  | -     |
|                 | p-value      | .81                | .52   | .41    | .43   | -    | .39                 | .19   | .95   | .54   | -     |
| RJ              | $\Delta(\%)$ |                    | 2.3   | -0.5   | 0.5   | -    |                     | 5.3   | 5.4   | 12.6  | -     |
|                 | p-value      | .83                | .45   | .81    | .94   | -    | < .01               | < .01 | < .01 | .04   | -     |
| RN              | $\Delta(\%)$ |                    | 8.9   | 6.4    | -6.3  | -    |                     | 0.2   | 2.6   | -3.2  | -     |
|                 | p-value      | .20                | .18   | .10    | .48   | -    | .81                 | .98   | .42   | .69   | -     |
| RS              | $\Delta(\%)$ |                    | 13.2  | 2.6    | 15.6  | -    |                     | 9.1   | 0.7   | 8.3   | -     |
|                 | p-value      | .02                | < .01 | .21    | .11   | -    | < .01               | < .01 | .64   | .24   | -     |
| RO              | $\Delta(\%)$ |                    | -10.5 | -1.5   | -     | -    |                     | 4.9   | 1.9   | -0.7  | -     |
|                 | p-value      | .29                | .12   | .74    | -     | -    | .64                 | .26   | .39   | .91   | -     |
| RR              | $\Delta(\%)$ |                    | -     | -      | -     | -    |                     | -4.4  | 11.6  | -     | -     |
|                 | p-value      | -                  | -     | -      | -     | -    | .01                 | .53   | .01   | -     | -     |
| SC              | $\Delta(\%)$ |                    | 2.4   | 1.3    | 0.2   | -    |                     | 5.1   | 6.1   | 0.9   | -     |
|                 | p-value      | .89                | .60   | .52    | .97   | -    | < .01               | .15   | < .01 | .84   | -     |
| SE              | $\Delta(\%)$ |                    | 1.4   | -5.4   | -8.6  | -    |                     | 0.6   | -5.5  | -     | -     |
|                 | p-value      | .59                | .88   | .43    | .37   | -    | .39                 | .93   | .32   | -     | -     |
| SP              | $\Delta(\%)$ |                    | 5.6   | 3.0    | 8.4   | 11.9 |                     | 5.5   | 5.1   | -3.8  | 5.6   |
|                 | p-value      | < .01              | < .01 | < .01  | .02   | .03  | < .01               | < .01 | < .01 | < .01 | .08   |
| TO              | $\Delta(\%)$ |                    | 11.8  | 13.8   | -     | -    |                     | 12.1  | 11.6  | 6.4   | -     |
|                 | p-value      | .07                | .12   | .02    | -     | -    | .02                 | < .01 | < .01 | .28   | -     |
